# Supplementary material for: Comparison of the non-radiative decay mechanisms of 4-pyrimidinone and uracil: an ab initio study
Source: Royal Society of Chemistry journal article supplement (doi:10.1039/b922505f), 2010-01-01
Supplement: b922505f.pdf [file b922505f.pdf]

# ESI

**Comparison of the non-radiative decay mechanisms of 4-pyrimidinone  
and uracil: an *ab initio* study**

Vassil B. Delchev, Andrzej L. Sobolewski and Wolfgang Domcke

**Table S1** Vertical excitation energies of 4Py and U (eV), calculated with the ground state geometries of the compounds, studied at CASPT2//CASSCF level

| State           | Ur           |             |         |             | Exp. |
|-----------------|--------------|-------------|---------|-------------|------|
|                 | CASPT2(10,9) |             | CC2     |             |      |
|                 | cc-pVDZ      | aug-cc-pVDZ | cc-pVDZ | aug-cc-pVDZ |      |
| $^1n_O\pi^*$    | 4.930        | 4.740       | 4.914   | 4.706       | 5.08 |
| $^1\pi\pi^*$    | 5.301        | 4.826       | 5.540   | 5.226       |      |
| $^1\pi\sigma^*$ | 7.109        | 5.690       | 7.221   | 5.814       |      |
|                 | 4Py          |             |         |             |      |
|                 | CASPT2(8,7)  |             | CC2     |             |      |
| $^1n_O\pi^*$    | 4.903        | 4.679       | 4.770   | 4.594       | 4.51 |
| $^1\pi\pi^*$    | 5.028        | 4.515       | 4.879   | 4.672       |      |
| $^1\pi\sigma^*$ | 7.504        | 5.936       | 7.519   | 5.882       |      |

**Table S2** Vertical excitation energies of 4Py and U (eV), calculated with the ground state geometries of the compounds, studied at CASPT2//MP2 level

| State           | U            |             |         |             | Exp. |
|-----------------|--------------|-------------|---------|-------------|------|
|                 | CASPT2(10,9) |             | CC2     |             |      |
|                 | cc-pVDZ      | aug-cc-pVDZ | cc-pVDZ | aug-cc-pVDZ |      |
| $^1n_O\pi^*$    | 4.77         | 4.74        | 4.91    | 4.71        | 5.08 |
| $^1\pi\pi^*$    | 5.18         | 4.80        | 5.54    | 5.23        |      |
| $^1\pi\sigma^*$ | -            | 5.66        | -       | 5.81        |      |
|                 | 4Py          |             |         |             |      |
|                 | CASPT2(8,7)  |             | CC2     |             |      |
| $^1n_O\pi^*$    | 4.87         | 4.77        | 4.77    | 4.59        | 4.51 |
| $^1\pi\pi^*$    | 4.47         | 4.30        | 4.88    | 4.67        |      |
| $^1\pi\sigma^*$ | -            | 5.84        | -       | 5.88        |      |

**Table S3** Adiabatic excitation energies (in eV) of the  ${}^1n_O\pi^*$  (A''),  ${}^1\pi\pi^*$  (A'), and  ${}^1\pi\sigma^*$  (A'') states of U and 4Py, studied at CASPT2//CASSCF level.

| State             | U                        |                 |
|-------------------|--------------------------|-----------------|
|                   | CASPT2(10,9)/aug-cc-pVDZ | CC2/aug-cc-pVDZ |
| ${}^1n_O\pi^*$    | 3.06                     | 2.37            |
| ${}^1\pi\pi^*$    | 3.72                     | 4.34            |
| ${}^1\pi\sigma^*$ | 5.15                     | 5.31            |
| 4Py               |                          |                 |
|                   | CASPT2(8,7)/aug-cc-pVDZ  | CC2/aug-cc-pVDZ |
|                   |                          |                 |
| ${}^1n_O\pi^*$    | 3.18                     | 2.09            |
| ${}^1\pi\pi^*$    | 2.77                     | 2.85            |
| ${}^1\pi\sigma^*$ | 5.22                     | 5.24            |

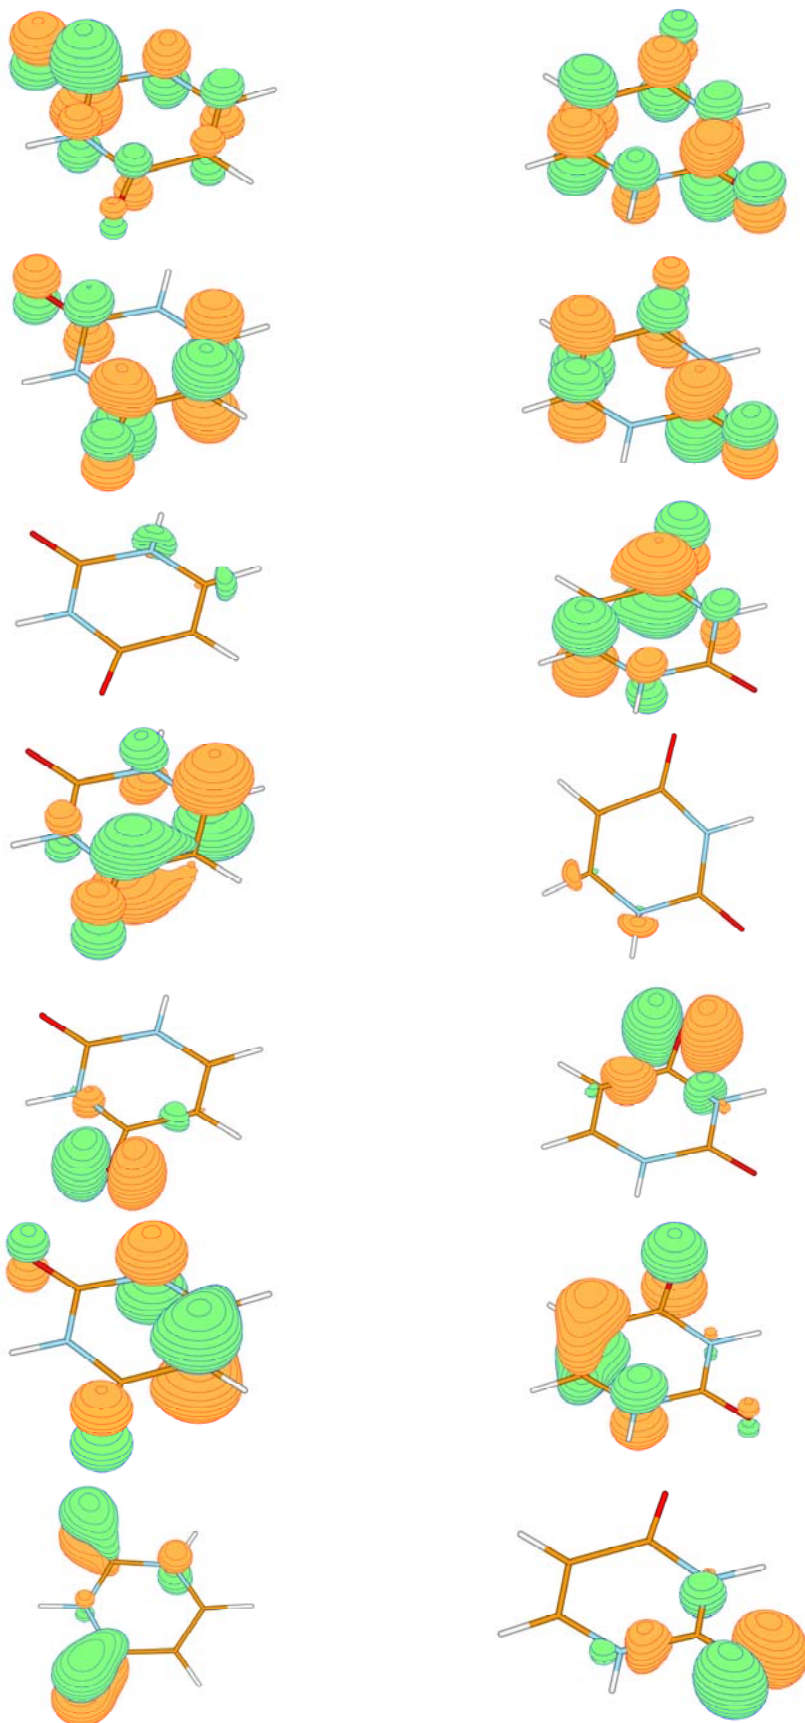

**Fig. S1**

*(Continued)*

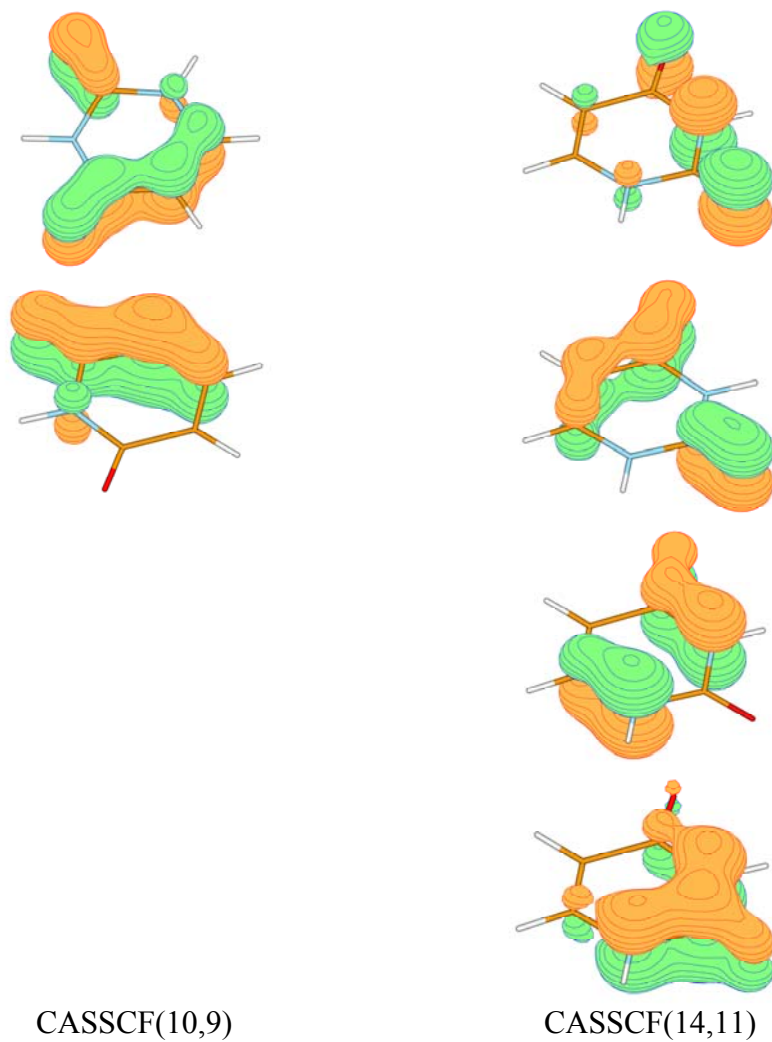

**Fig. S1** State-averaged active molecular orbitals of U, obtained with the aug-cc-pVDZ basis set at the ground-state equilibrium geometry.

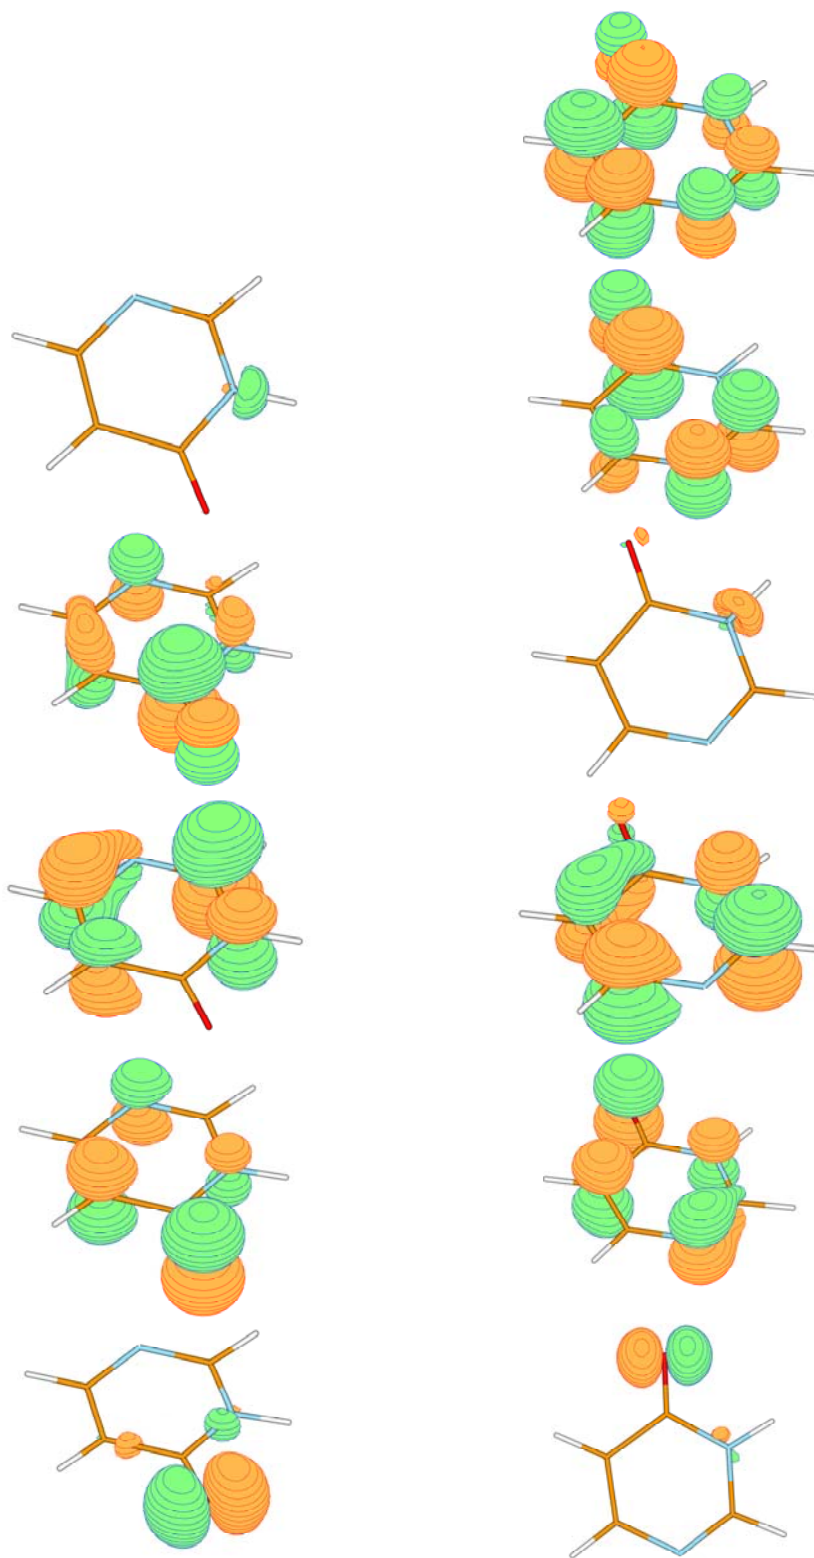

**Fig. S2**

*(Continued)*

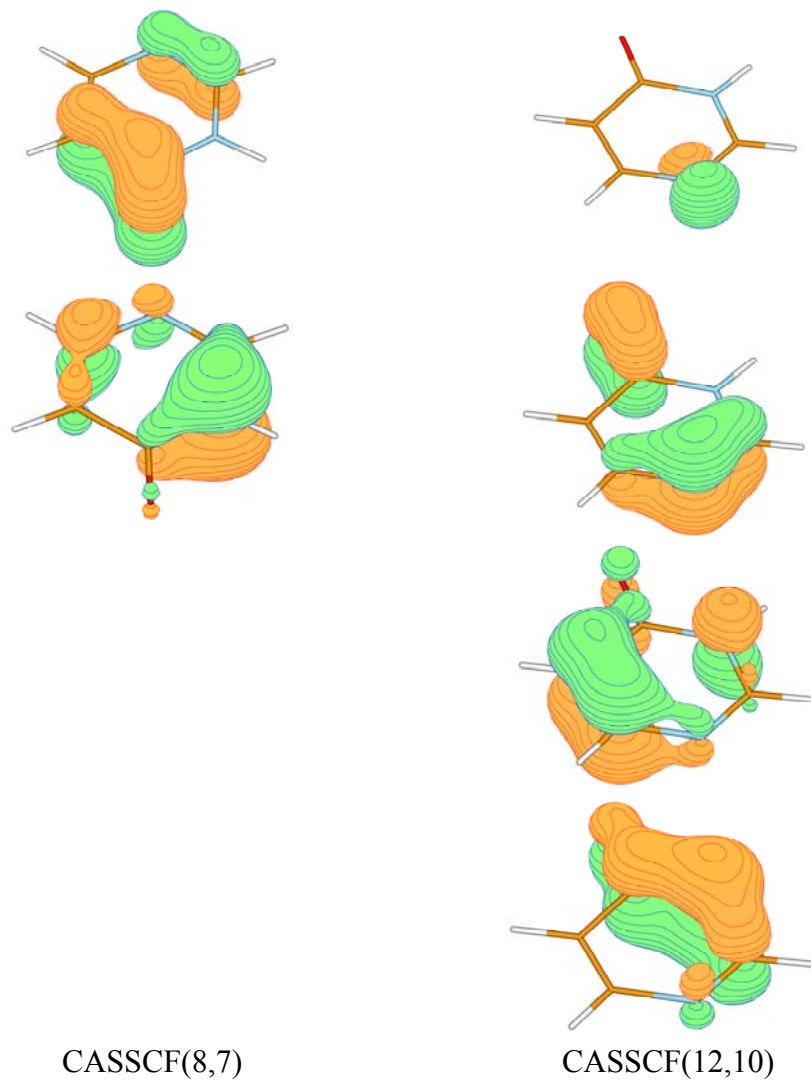

**Fig. S2** State-averaged active molecular orbitals of 4Py, obtained with the aug-cc-pVDZ basis set at the ground-state equilibrium geometry.

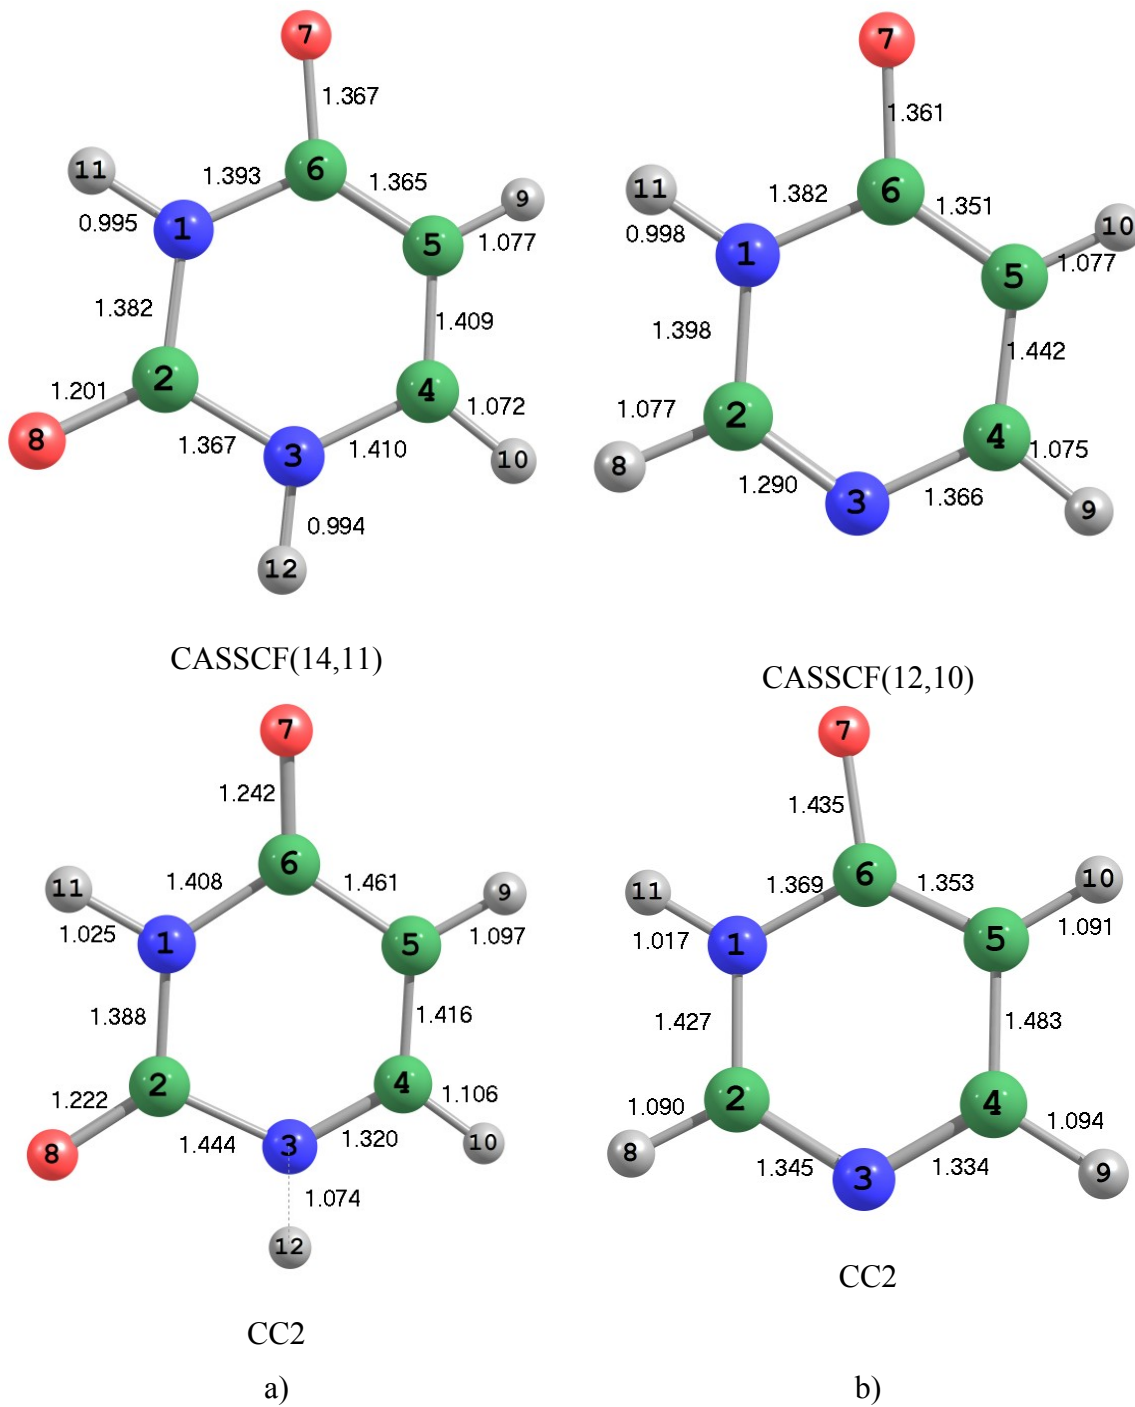

**Fig. S3** Optimized structures ( $C_s$ ) of the  $^1n_0\pi^*$  state of a) U and b) 4Py at CASSCF and CC2 levels



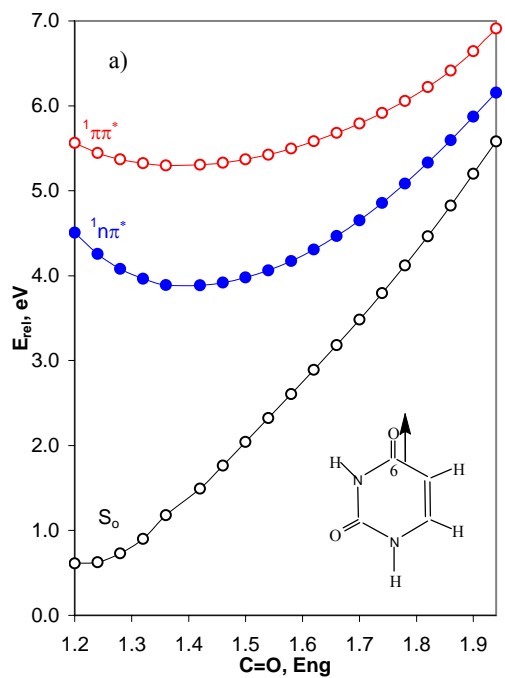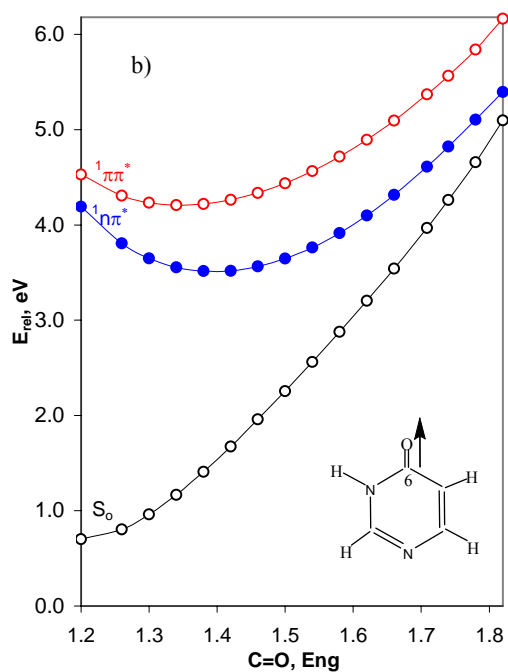

**Fig. S4** Potential-energy profiles of C=O elongation for U (a) and 4Py (b). The geometry optimization was carried out for the  $^1n_0\pi^*$  state (closed circles) at the CC2/cc-pVDZ level. The energies are referred to the energies of the ground-state equilibrium geometries

Optimized {CASSCF(6,6)/6-31G\*}  $S_0/S_1$  conical intersection related to C=C twisting in U

|   |           |           |           |
|---|-----------|-----------|-----------|
| 7 | 0.120612  | -0.924401 | -0.115620 |
| 6 | -0.055799 | -0.460961 | 1.143920  |
| 7 | -0.004618 | 0.962440  | 1.264188  |
| 6 | 0.174602  | 1.708526  | 0.187361  |
| 6 | -0.357699 | 1.250583  | -1.076020 |
| 6 | 0.043700  | -0.157785 | -1.330198 |
| 8 | 0.183143  | -0.746980 | -2.359037 |
| 8 | -0.137486 | -1.118454 | 2.129435  |
| 1 | 0.696608  | 2.641091  | 0.348150  |
| 1 | -1.436063 | 1.162349  | -0.904285 |
| 1 | 0.232926  | -1.914219 | -0.192377 |
| 1 | 0.194028  | 1.275015  | 2.196521  |

Optimized {CASSCF(6,6)/6-31G\*}  $S_0/S_1$  conical intersection related to the C=C twisting in 4Py

|   |           |           |           |
|---|-----------|-----------|-----------|
| 7 | 0.074145  | -0.236734 | 0.044290  |
| 6 | 0.133579  | 0.074344  | 1.333842  |
| 7 | 1.276734  | 0.310605  | 2.036448  |
| 6 | 2.311535  | 0.078145  | 1.228061  |
| 6 | 2.287488  | 0.601684  | -0.093378 |
| 6 | 1.156572  | 0.286916  | -0.853795 |
| 8 | 0.803968  | 0.663421  | -1.934718 |
| 1 | -0.792407 | 0.005772  | 1.901816  |
| 1 | 2.230592  | 1.663752  | -0.079058 |
| 1 | 3.047316  | -0.680390 | 1.521392  |
| 1 | -0.798099 | -0.469258 | -0.393829 |

Optimized {CASSCF(6,6)/6-31G\*}  $S_0/S_1$  conical intersection related to C=N twisting in 4Py

|   |           |           |           |
|---|-----------|-----------|-----------|
| 7 | -0.039747 | 0.056397  | 0.037884  |
| 6 | -0.019370 | -0.034925 | 1.423154  |
| 7 | 1.239930  | -0.021464 | 1.945563  |
| 6 | 1.629789  | 1.215610  | 1.846764  |
| 6 | 0.967414  | 2.055815  | 0.922523  |
| 6 | 0.355954  | 1.441207  | -0.205115 |
| 8 | 0.031249  | 1.984366  | -1.228644 |
| 1 | -0.913376 | -0.149606 | 2.063582  |
| 1 | 1.252557  | 3.070419  | 0.789150  |
| 1 | 2.506168  | 1.536212  | 2.391990  |
| 1 | -0.874469 | -0.145426 | -0.485191 |
